# Supplementary material for: A Comprehensive Analysis of Baseline Clinical Characteristics and Biomarkers Associated with Outcome in Advanced Melanoma Patients Treated with Pembrolizumab
Source: MDPI journal article supplement (doi:10.3390/cancers13020168), 2021-01-06
Supplement: s1 [file s1]

# Supplementary Material: A Comprehensive Analysis of Baseline Clinical Characteristics and Biomarkers Associated with Outcome in Advanced Melanoma Patients Treated with Pembrolizumab

Gil Awada, Yanina Jansen, Julia Katharina Schwarze, Jens Tijtgat, Lennert Hellinckx, Odrade Gondry, Sim Vermeulen, Sarah Warren, Kelly Schats, Pieter-Jan van Dam, Mark Kockx, Marleen Keyaerts, Hendrik Everaert, Teofila Seremet, Anne Rogiers and Bart Neyns

**Table S1.** Scores in the NanoString PanCancer IO360 gene expression profiling panel.

|                                      |                                       |                                      |
|--------------------------------------|---------------------------------------|--------------------------------------|
| <b>TIS:</b> tumor inflammation score | <b>IFN Gamma:</b> interferon          | <b>PD-L2:</b> programmed cell death  |
| <b>APM:</b> antigen-presenting       | gamma                                 | ligand 2                             |
| machinery                            | <b>IL10:</b> interleukin-10           | <b>Proliferation</b>                 |
| <b>Apoptosis</b>                     | <b>Immunoproteasome</b>               | <b>Stroma</b>                        |
| <b>ARG1:</b> arginase 1              | <b>Inflammatory Chemokines</b>        | <b>T Cells</b>                       |
| <b>B7-H3:</b> B7 homolog 3           | <b>Lymphoid</b>                       | <b>TGF-Beta:</b> transforming        |
| <b>CD45</b>                          | <b>Macrophages</b>                    | growth factor beta                   |
| <b>CD8 T Cells</b>                   | <b>MAGEs:</b> melanoma-associated     | <b>TH1 Cells:</b> T helper 1 cells   |
| <b>CTLA4:</b> cytotoxic T-           | antigens                              | <b>TIGIT:</b> T cell immunoreceptor  |
| lymphocyte associated                | <b>Mast Cells</b>                     | with Ig and ITIM domains             |
| antigen-4                            | <b>MHC2:</b> major                    | <b>Treg:</b> regulatory T cells      |
| <b>Cytotoxic Cells</b>               | histocompatibility complex 2          | <b>MMR Loss:</b> mismatch repair     |
| <b>Cytotoxicity</b>                  | <b>Myeloid</b>                        | loss                                 |
| <b>DC:</b> dendritic cells           | <b>Myeloid Inflammation</b>           | <b>Hypermutation</b>                 |
| <b>Endothelial Cells</b>             | <b>Neutrophils</b>                    | <b>MSI Predictor:</b> microsatellite |
| <b>Exhausted CD8</b>                 | <b>NK CD56dim</b>                     | instability predictor                |
| <b>Glycolytic activity</b>           | <b>NK Cells:</b> natural killer cells | <b>APM Loss:</b> antigen-presenting  |
| <b>Hypoxia</b>                       | <b>NOS2:</b> Nitric oxide synthase 2  | machinery loss                       |
| <b>IDO1:</b> indoleamine 2,3-        | <b>PD-1:</b> programmed cell death    | <b>JAKSTAT Loss</b>                  |
| dioxygenase 1                        | 1                                     |                                      |
| <b>IFN Downstream:</b> interferon    | <b>PD-L1:</b> programmed cell death   |                                      |
| downstream signaling                 | ligand 1                              |                                      |

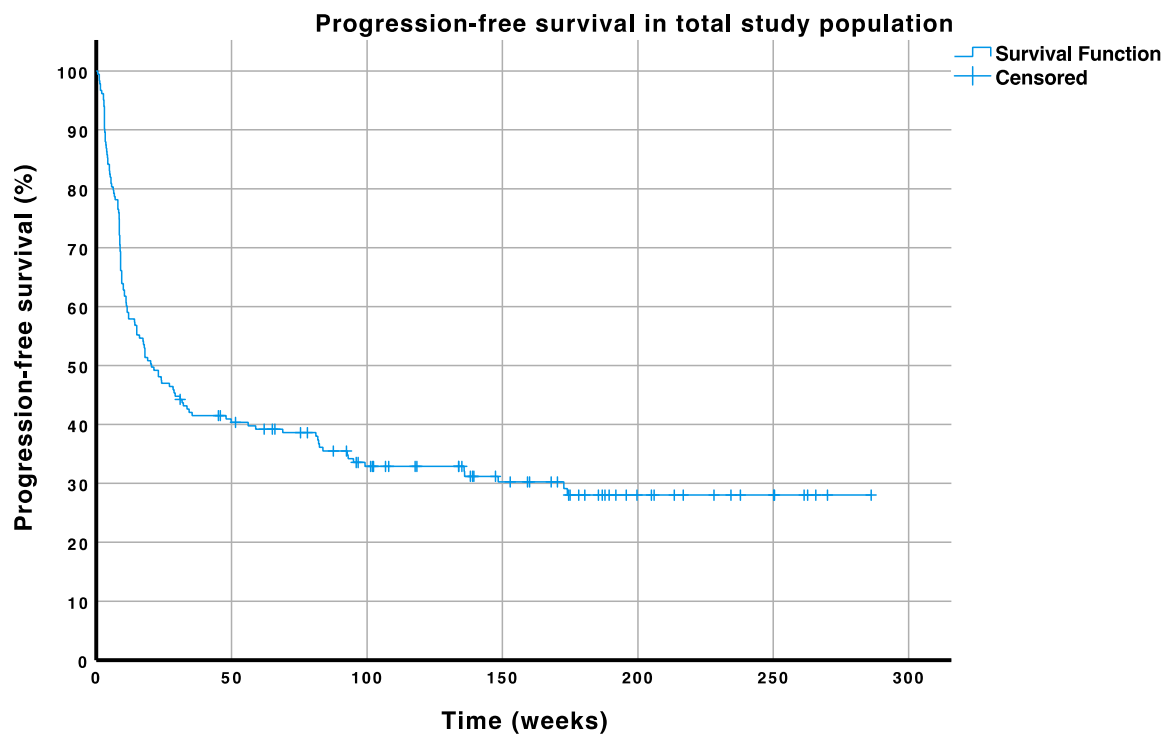

**Figure S1.** Progression-free survival in the total study population ( $n = 183$ ).

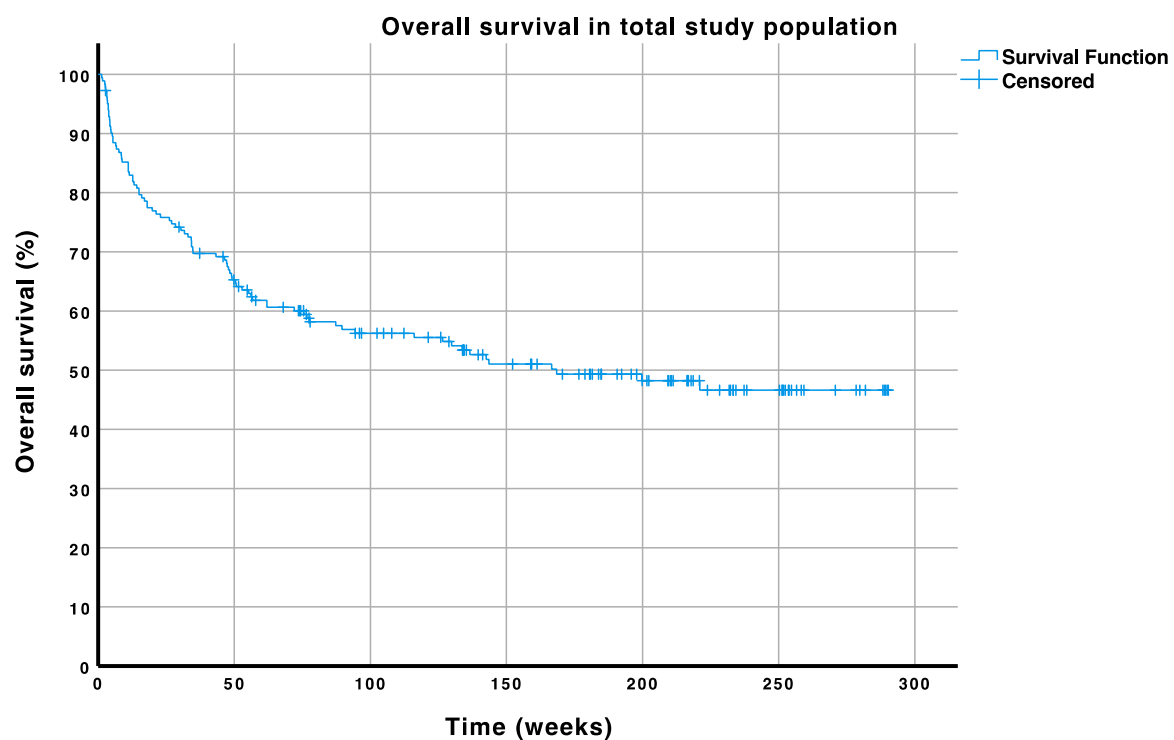

**Figure S2.** Overall survival in the total study population ( $n = 183$ ).

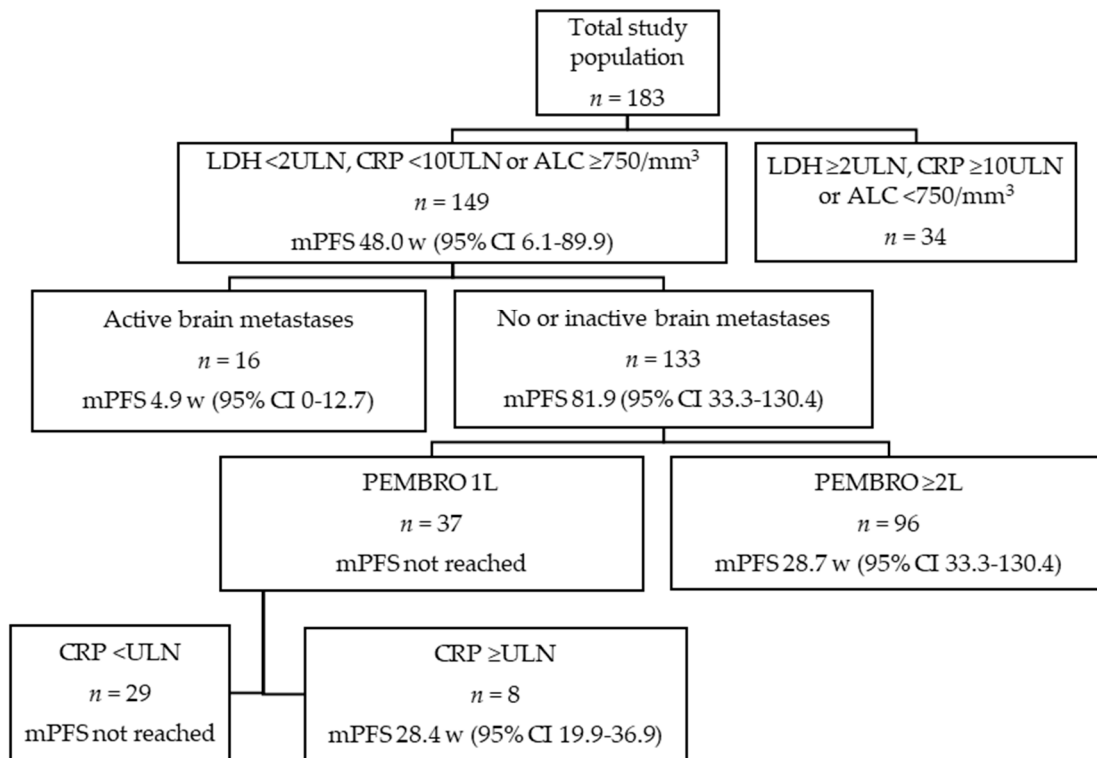

**Figure S3.** Recursive partitioning analysis in the population of patients with CRP <10ULN, LDH <2ULN or ALC ≥750/mm<sup>3</sup> (*n* = 149) with regards to progression-free survival. Abbreviations: 95% CI: 95% confidence interval; ALC: absolute lymphocyte count; CRP: C-reactive protein; LDH: lactate dehydrogenase; mPFS: median progression-free survival; PEMBRO 1L: pembrolizumab as first-line treatment; PEMBRO ≥2L: pembrolizumab as second line or later treatment; ULN: upper limit of normal; w: weeks.

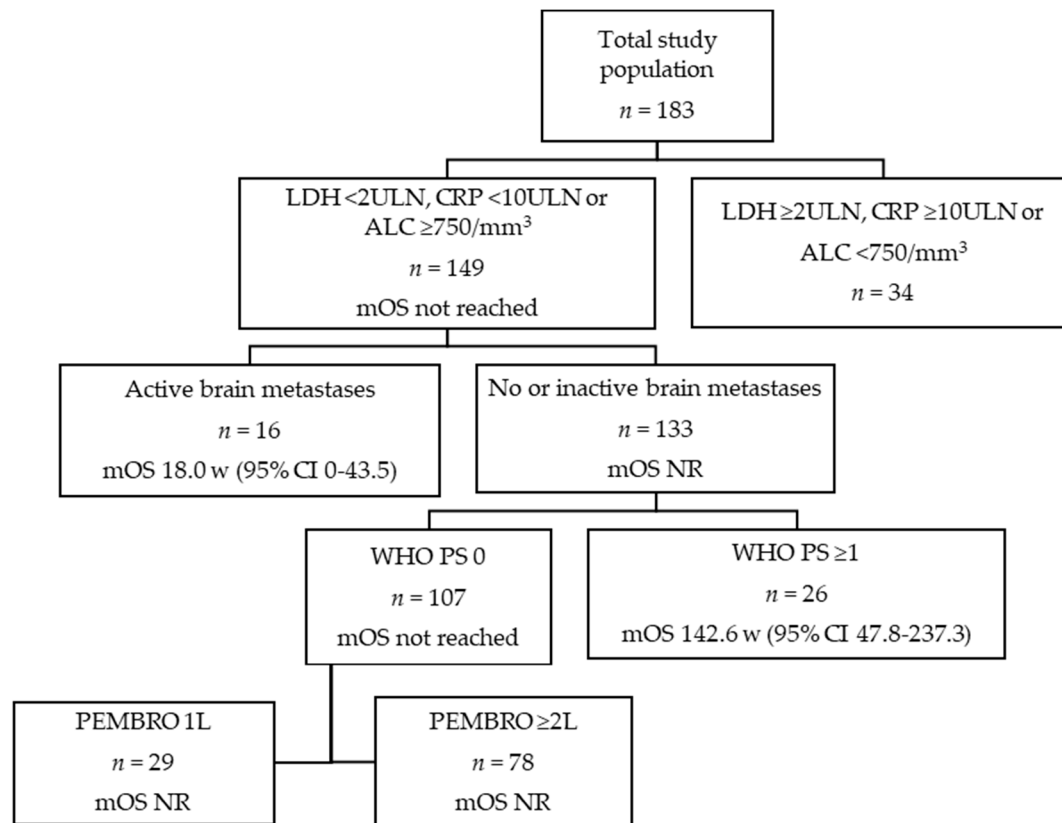

**Figure S4.** Recursive partitioning analysis in the population of patients with CRP <10ULN, LDH <2ULN or ALC ≥750/mm<sup>3</sup> (n = 149) with regards to overall survival. Abbreviations: 95% CI: 95% confidence interval; ALC: absolute lymphocyte count; CRP: C-reactive protein; LDH: lactate dehydrogenase; mOS: median overall survival; PEMBRO 1L: pembrolizumab as first-line treatment; PEMBRO ≥2L: pembrolizumab as second line or later treatment; ULN: upper limit of normal; w: weeks; WHO PS: World Health Organization Performance Status.

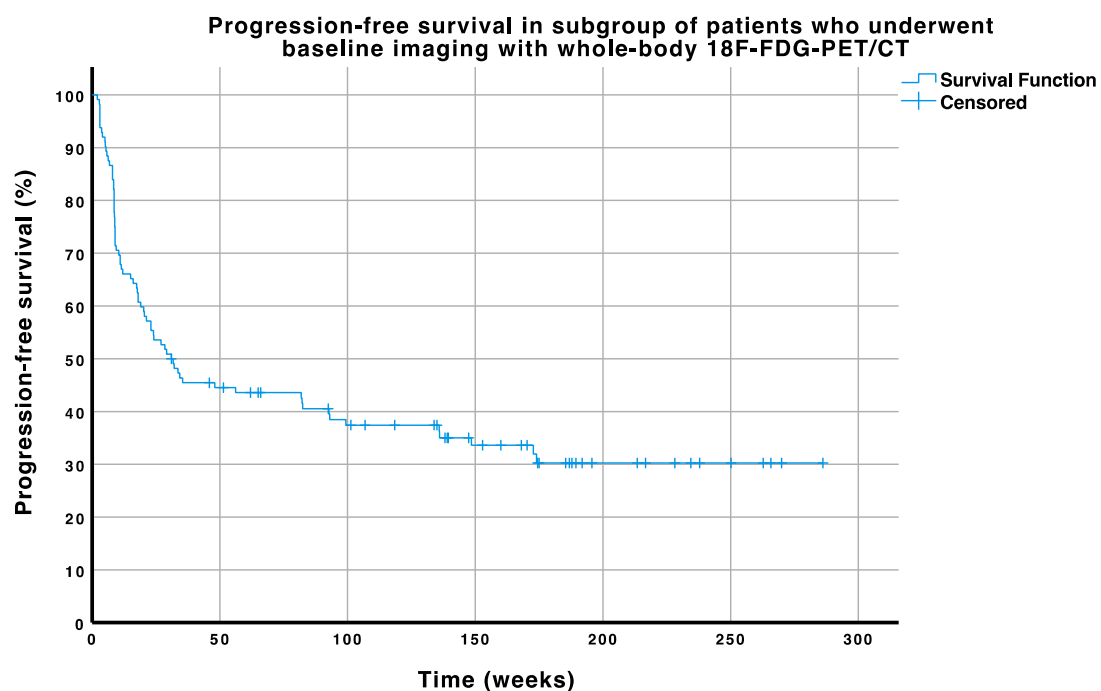

**Figure S5.** Progression-free survival in the subgroup of patients who underwent baseline imaging with whole-body  $^{18}\text{F}$ -FDG-PET/CT ( $n = 112$ ). Abbreviations:  $^{18}\text{F}$ -FDG-PET/CT: 18-fluorodeoxyglucose positron emission tomography/computed tomography.

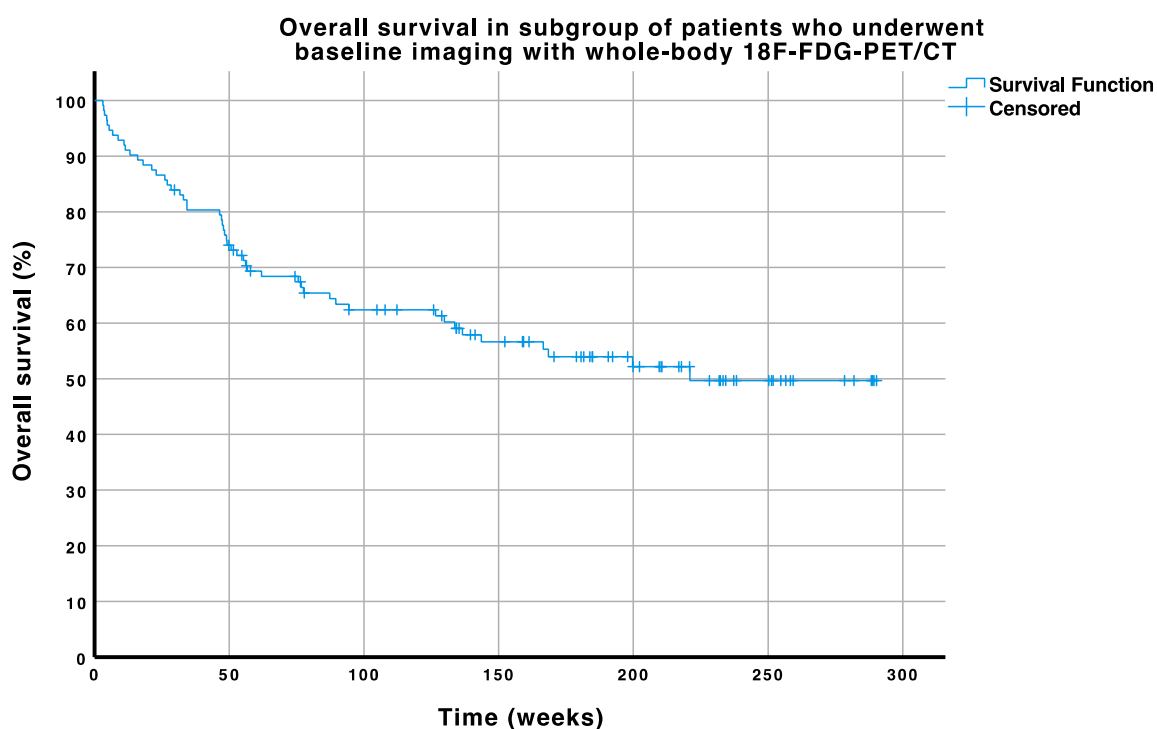

**Figure S6.** Overall survival in the subgroup of patients who underwent baseline imaging with whole-body  $^{18}\text{F}$ -FDG-PET/CT ( $n = 112$ ). Abbreviations:  $^{18}\text{F}$ -FDG-PET/CT: 18-fluorodeoxyglucose positron emission tomography/computed tomography.

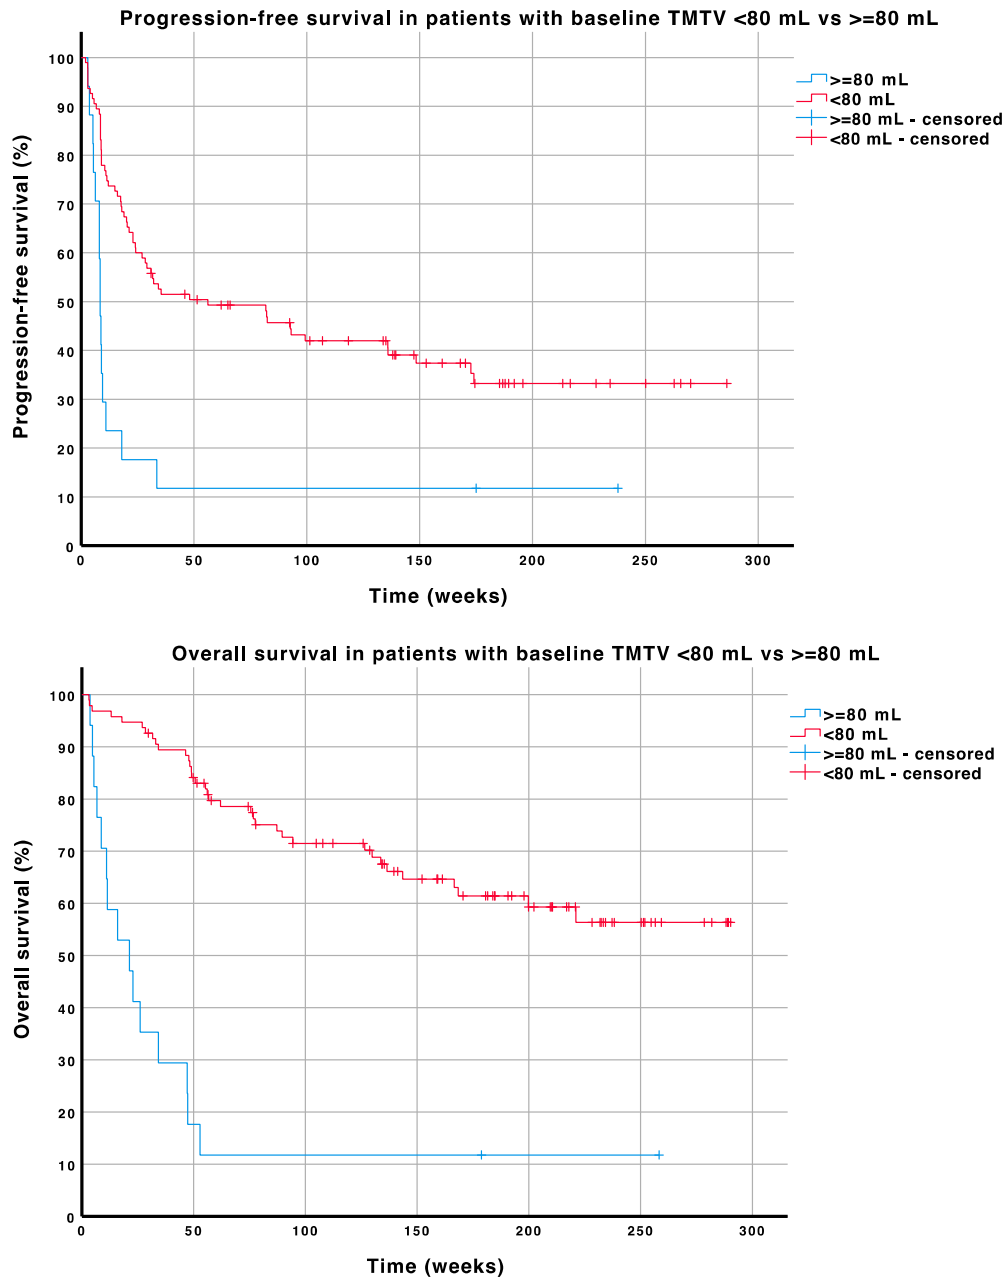

**Figure S7.** Progression-free and overall survival in the subgroup of patients who underwent baseline imaging with whole-body  $^{18}\text{F}$ -FDG-PET/CT with baseline TMTV of <80 mL ( $n = 95$ ) versus  $\geq 80$  mL ( $n = 17$ ). Abbreviations:  $^{18}\text{F}$ -FDG-PET/CT: 18-fluorodeoxyglucose positron emission tomography/computed tomography; TMTV: total metabolic tumor volume.

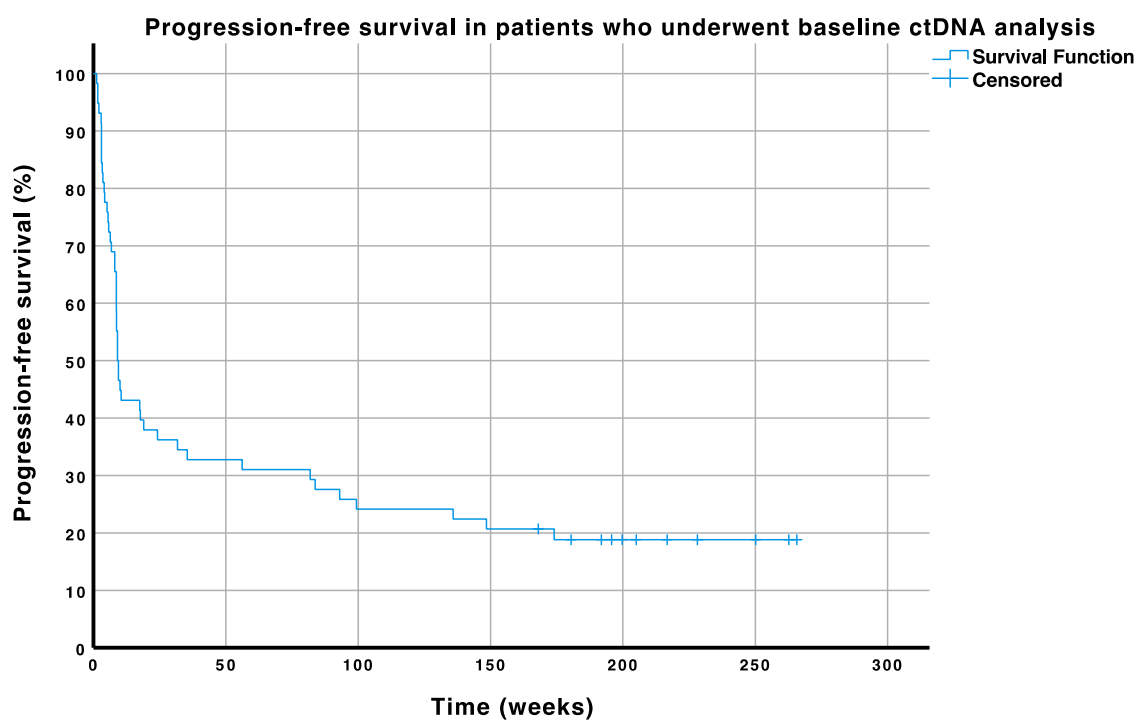

**Figure S8.** Progression-free survival curve in the subgroup of patients who underwent baseline ctDNA analysis ( $n = 58$ ). Abbreviations: ctDNA: circulating tumor DNA.

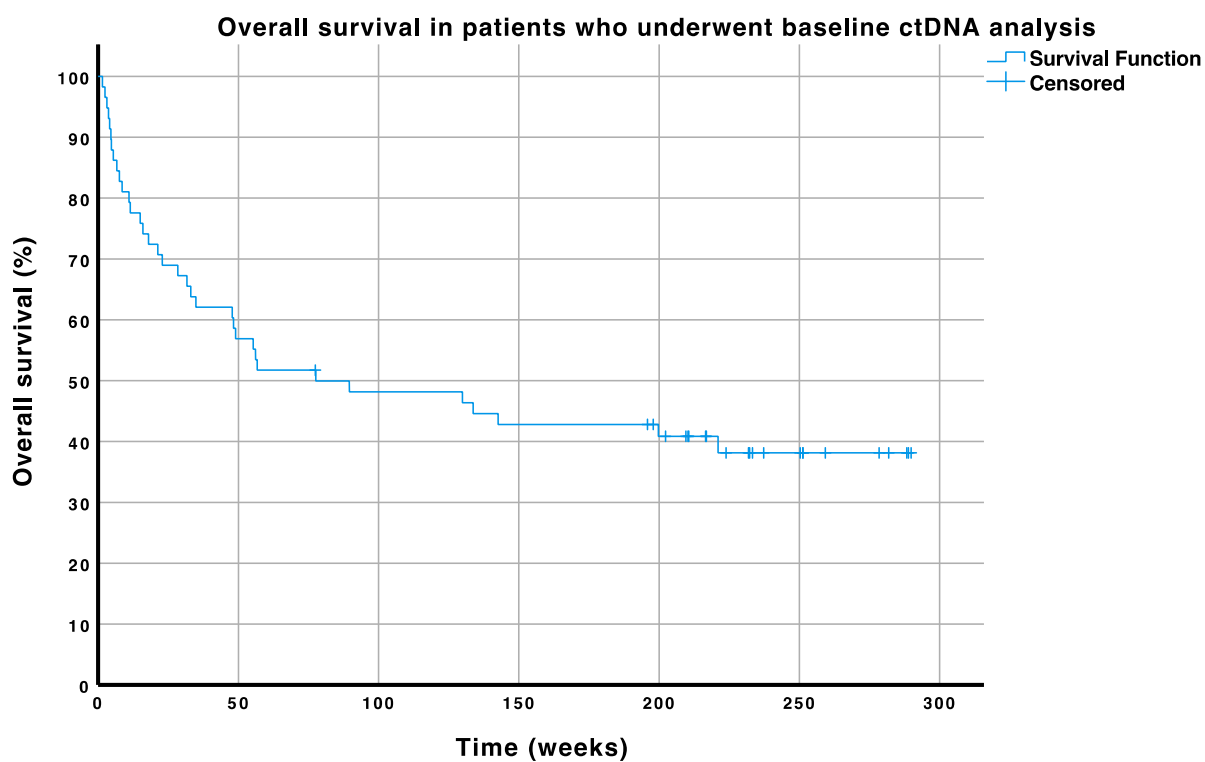

**Figure S9.** Overall survival curve in the subgroup of patients who underwent baseline ctDNA analysis ( $n = 58$ ). Abbreviations: ctDNA: circulating tumor DNA.

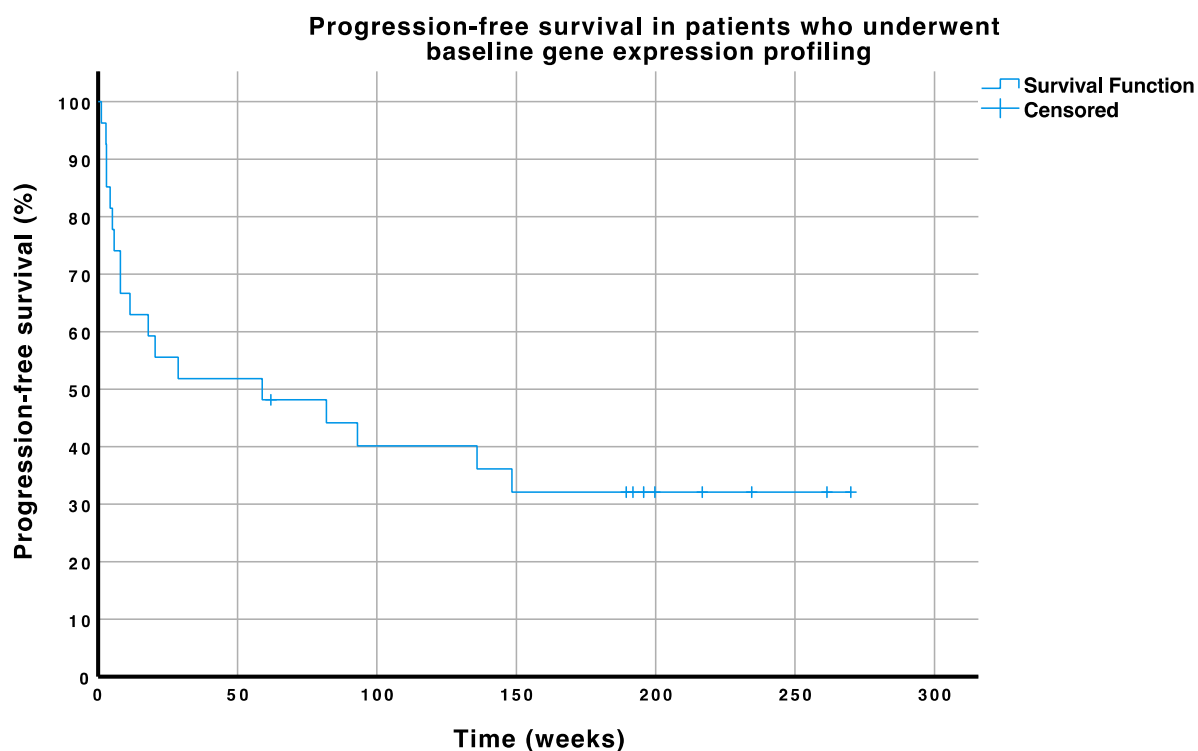

**Figure S10.** Progression-free survival curve in the subgroup of patients who underwent baseline gene expression profiling on tumor tissue ( $n = 27$ ).

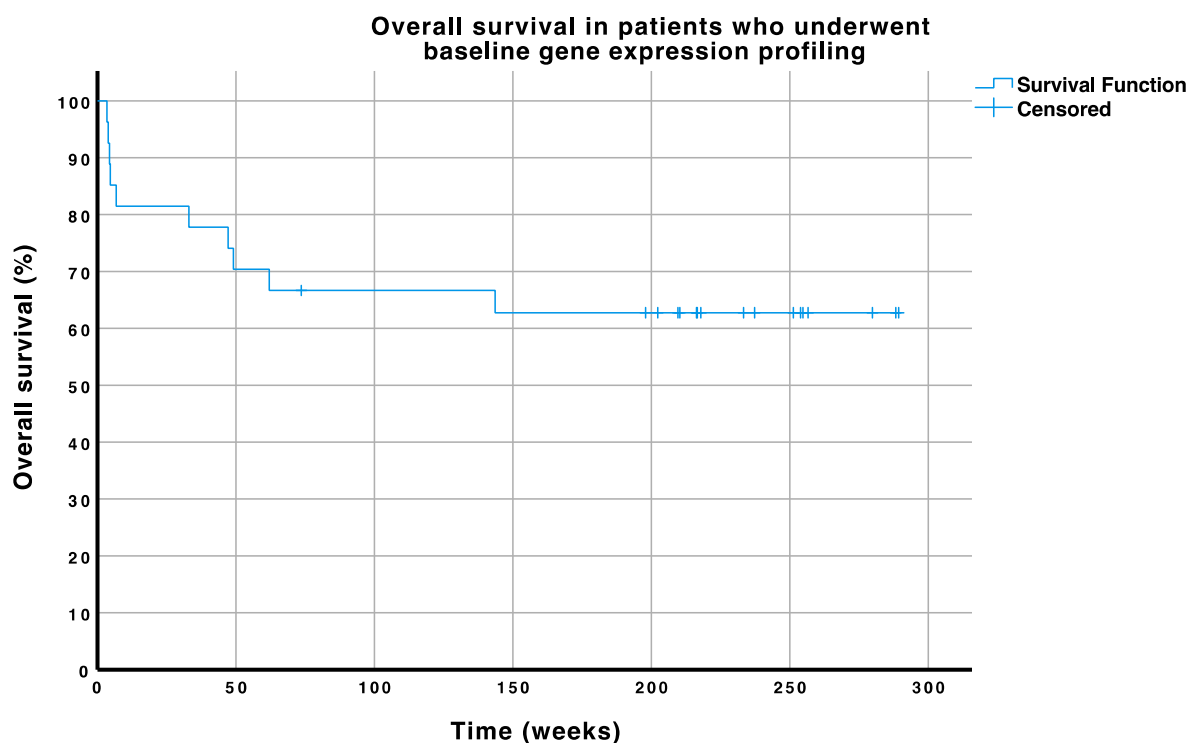

**Figure S11.** Overall survival curve in the subgroup of patients who underwent baseline gene expression profiling on tumor tissue ( $n = 27$ ).
